# Supplementary material
Source: PubMed Central journal article supplement (PMC4689309)
Supplement: NIHMS743074-supplement-01.pdf [file NIHMS743074-supplement-01.pdf]

## SUPPORTING INFORMATION

Additional Supporting Information may be found in the online version of this article:

**Figure S1.** Summary of electrode placements.

**Figure S2.** Schematic of experimental design for acute and chronic experiments.

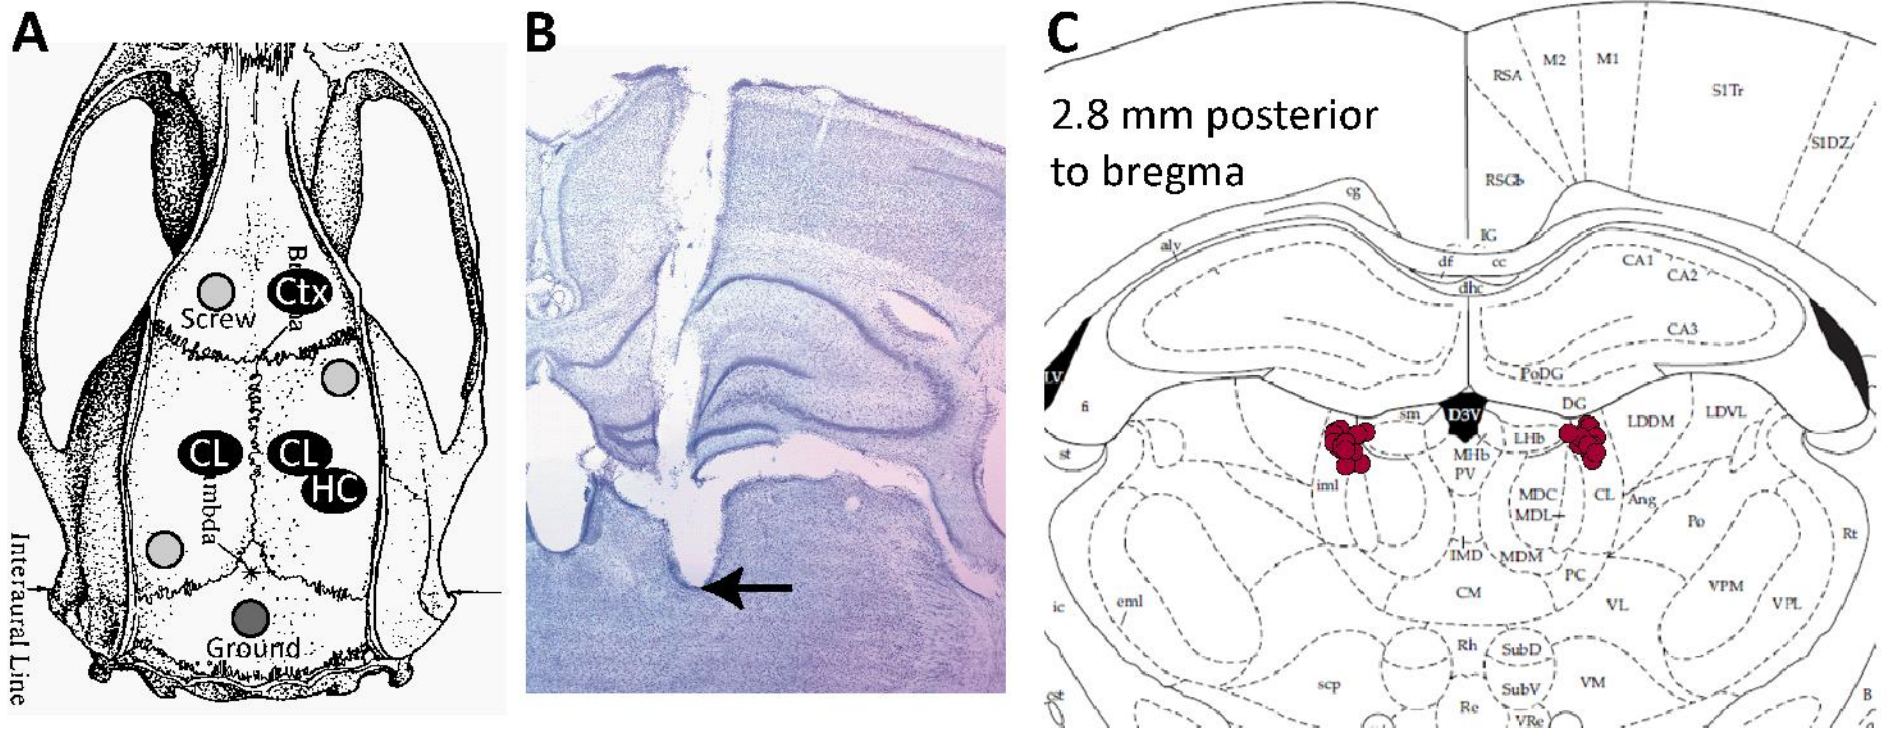

FIGURE S1

Acute experiments

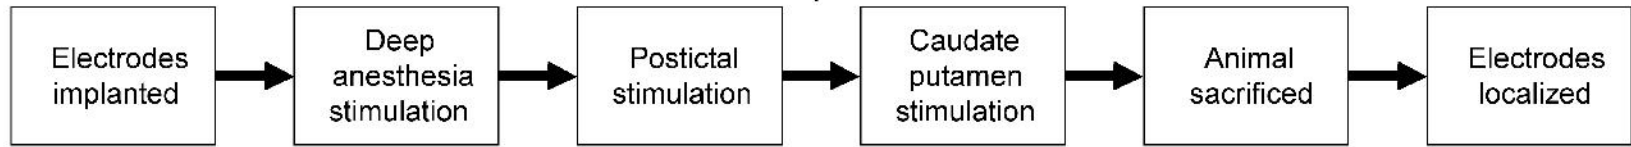

Chronic experiments

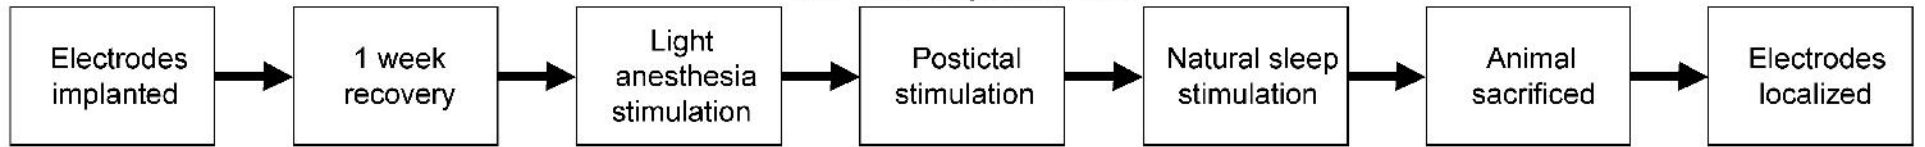

FIGURE S2
